# Supplementary material for: Exploring the Role of Ccn3 in Type III Cell of Mice Taste Buds
Source: PubMed Central journal article supplement — J Neurochem. 2024 Dec 22;169(1):e16291. doi: 10.1111/jnc.16291 (PMC11663453; doi:10.1111/jnc.16291), 2024-12-22
Supplement: JNC-169-0-s001.pdf [file JNC-169-0-s001.pdf]

# **Exploring the Role of Ccn3 in Type III Cell of Mice Taste Buds**

Kuanyu Wang, Yoshihiro Mitoh, Kengo Horie, Ryusuke Yoshida\*

Affiliation:

Department of Oral Physiology, Faculty of Medicine, Dentistry and Pharmaceutical Sciences, Okayama University, Japan.

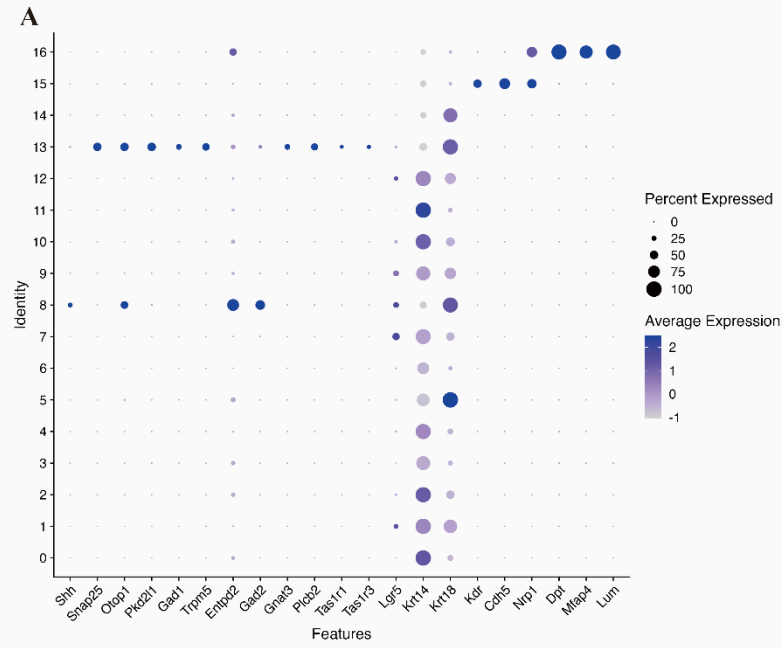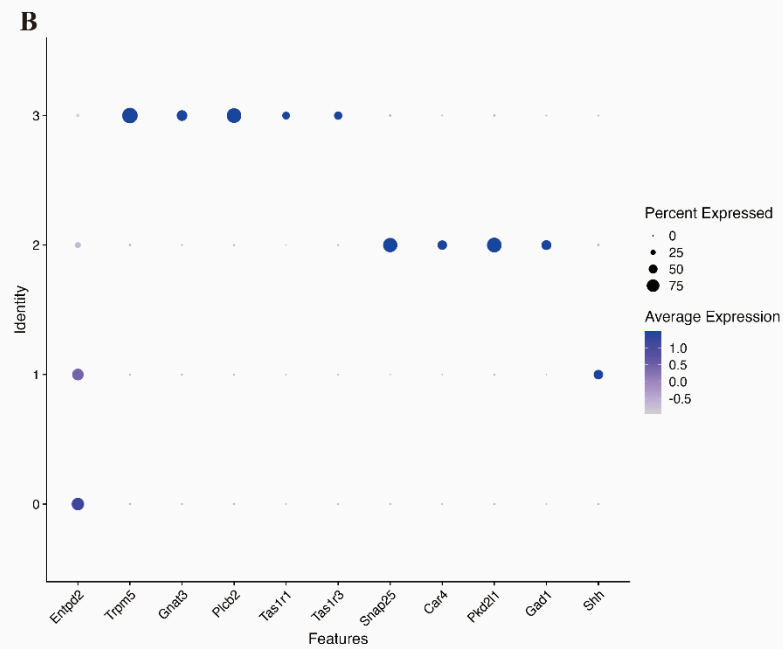

**Supplementary Figure 1. Dot Plot of marker genes.**

(A) Dot Plot illustrating the expression of marker genes across various cell subsets in epithelial cells from the CvP and the FoP of the mouse tongue. Cluster 8 and 13 are taste cell clusters. The markers corresponding to the cell annotation are presented in Supplementary Table 9. (B) Dot Plot illustrating the expression of marker genes across various cell subsets in taste cells from the CvP and the FoP of the mouse tongue. Cluster 0 is Type I taste cell, cluster 1 is Type IV taste cell, cluster

2 is Type III taste cell, and cluster 4 is Type II taste cell. The markers corresponding to the cell annotation are presented in Supplementary Table 10. Row data from (Vercauteren Drubbel & Beck, 2023).

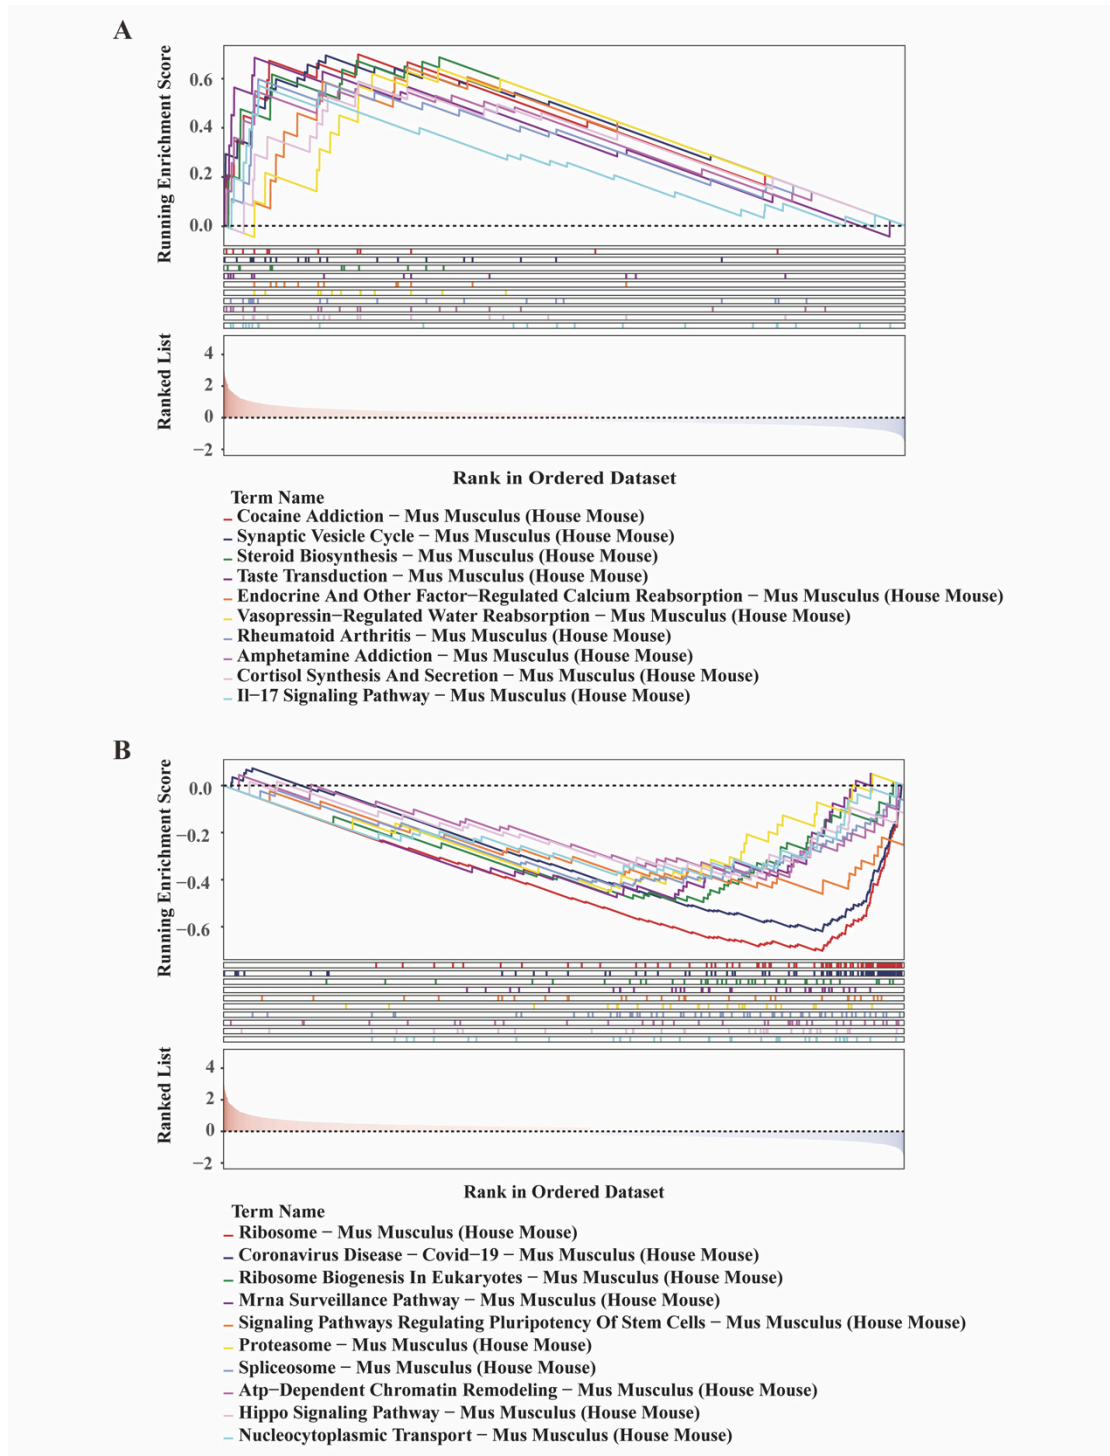

**Supplementary Figure 2. Predicting the potential functions of *Ccn3*+Type III and *Ccn3*-Type III cell subgroups.**

(A) GSEA enrichment analysis showing the top ten genes sets enriched in *Ccn3*+Type III cell subgroups. (B) GSEA enrichment analysis showing the top ten genes sets enriched in *Ccn3*-Type III cell subgroups. Row data from (Vercauteren Drubbel & Beck, 2023).

**Supplementary Table 1. Primers for RT-PCR**

|              | Forward               | Reverse               | product |
|--------------|-----------------------|-----------------------|---------|
| <i>Ccn3</i>  | CAGACCCCAACAACCAGACT  | TCAACTCCTACGGTGGCTTC  | 325bp   |
| <i>Gnat3</i> | TGCTTTGAAGGAGTGACGTG  | GTAGCGCAGGTCATGTGAGA  | 341bp   |
| <i>Actb</i>  | GGTTCCGATGCCCTGAGGCTC | ACTTGCGGTGCACGATGGAGG | 370bp   |

**Supplementary Table 2. Primers for DNA templates for ISH probes**

|             | Forward                                          | Reverse                                         | product |
|-------------|--------------------------------------------------|-------------------------------------------------|---------|
| <i>Ccn3</i> | AGCCTGTAACAGCCCTAGCA                             | ATTTCTGGTGCGGAGACAC                             | 827bp   |
| AS<br>probe | AGCCTGTAACAGCCCTAGCA                             | CTAATACGACTCACTATAGGGAGA<br>ATTTCTGGTGCGGAGACAC |         |
| S<br>probe  | CTAATACGACTCACTATAGGGAGA<br>AGCCTGTAACAGCCCTAGCA | ATTTCTGGTGCGGAGACAC                             |         |

**Supplementary Table 3. Primers for qRT-PCR**

|               | Forward                  | Reverse                  | product |
|---------------|--------------------------|--------------------------|---------|
| <i>Gapdh</i>  | TGTGTCCGTCGTGGATCTGA     | TTGCTGTTGAAGTCGCAGGAG    | 150bp   |
| <i>Entpd2</i> | ATGGCTGGAAAGTTGGTGTC     | TCTTGGGTAGGGACGCACA      | 92bp    |
| <i>Gnat3</i>  | AGGGCATCTGAATACCAGCTCAA  | CTGATCTCTGGCCACCTACATCAA | 196bp   |
| <i>Ca4</i>    | TTGTCCTGCTAGGACAAAGGTGAA | TCCGATAATGCACGCACCTC     | 140bp   |
| <i>Otop1</i>  | TCACGGCCTTCTGTTTCTT      | GCCAAAGACAATTCCTCCA      | 101bp   |
| <i>Ccn3</i>   | AGCCTGTAACAGCCCTAGCA     | CGCAGAGATGCAGAGACTTG     | 111bp   |

**Supplementary Table 4. Two-sample Student's t-test results of taste cell numbers in FuP.**

| <b>Cell type</b> | <b>Degrees of Freedom</b> | <b>T-value</b> | <b>P-value</b> |
|------------------|---------------------------|----------------|----------------|
| Type II cells    | 176                       | -1.05          | 0.296          |
| Type III cells   | 150                       | 0.306          | 0.760          |

\*:P<0.05, \*\*:P<0.01, \*\*\*: P<0.001



**Supplementary Table 5. Two-sample Student's t-test results of qRT-PCR.**

| <b>Gene</b>   | <b>Group</b> | <b>Degrees of Freedom</b> | <b>T-value</b> | <b>P-value</b> |
|---------------|--------------|---------------------------|----------------|----------------|
| <i>Entpd2</i> | FuP          | 9                         | -1.3822        | 0.2002         |
| <i>Gnat3</i>  | FuP          | 9                         | -1.1991        | 0.2611         |
| <i>Ca4</i>    | FuP          | 9                         | -0.9271        | 0.9282         |
| <i>Otop1</i>  | FuP          | 9                         | -1.7645        | 0.1145         |
| <i>Ccn3</i>   | FuP          | 9                         | 7.9719         | <0.001***      |
| <i>Entpd2</i> | CvP          | 10                        | -1.3874        | 0.1954         |
| <i>Gnat3</i>  | CvP          | 10                        | -0.0596        | 0.9537         |
| <i>Ca4</i>    | CvP          | 10                        | 0.4331         | 0.6741         |
| <i>Otop1</i>  | CvP          | 10                        | -0.561         | 0.5872         |
| <i>Ccn3</i>   | CvP          | 10                        | 11.178         | <0.001***      |

\*:P<0.05, \*\*:P<0.01, \*\*\*: P<0.001

**Supplementary Table 6. Two-way ANOVA results of CT nerve recordings.**

| <b>Tastant</b> | <b>Effect</b> | <b>Degree of Freedom</b> | <b>F Value</b> | <b>p Value</b> |
|----------------|---------------|--------------------------|----------------|----------------|
| HCl            | genotype      | 1.00                     | 3.76           | 0.057          |
|                | concentration | 4.00                     | 158.18         | <0.001***      |
|                | interaction   | 4.00                     | 1.05           | 0.391          |
| Sucrose        | genotype      | 1.00                     | 0.71           | 0.403          |
|                | concentration | 4.00                     | 98.464         | <0.001***      |
|                | interaction   | 4.00                     | 0.779          | 0.543          |
| MPG            | genotype      | 1.00                     | 0.0199         | 0.888          |
|                | concentration | 3.00                     | 45.6768        | <0.001***      |
|                | interaction   | 3.00                     | 0.2961         | 0.828          |
| Quinine        | genotype      | 1.00                     | 1.756          | 0.19           |
|                | concentration | 4.00                     | 140.694        | <0.001***      |
|                | interaction   | 4.00                     | 0.295          | 0.88           |
| NaCl           | genotype      | 1.00                     | 1.124          | 0.293          |
|                | concentration | 4.00                     | 144.323        | <0.001***      |
|                | interaction   | 4.00                     | 0.338          | 0.852          |

\*:P<0.05, \*\*:P<0.01, \*\*\*: P<0.001

**Supplementary Table 7. Repeated ANOVA results of behavioral lick responses.**

| <b>Tastant</b> | <b>Effect</b> | <b>Degree of Freedom</b> | <b>F Value</b> | <b>p Value</b> |
|----------------|---------------|--------------------------|----------------|----------------|
| HCl            | genotype      | 2.00                     | 0.953          | 0.408          |
|                | concentration | 5.00                     | 2040.773       | <0.001***      |
|                | interaction   | 10.00                    | 0.719          | 0.704          |
| Citric acid    | genotype      | 2.00                     | 0.0128         | 0.987          |
|                | concentration | 5.00                     | 3926.921       | <0.001***      |
|                | interaction   | 10.00                    | 0.549          | 0.849          |
| NaCl           | genotype      | 2.00                     | 0.131          | 0.878          |
|                | concentration | 5.00                     | 1872.2         | <0.001***      |
|                | interaction   | 10.00                    | 1.05           | 0.413          |
| Quinine        | genotype      | 2.00                     | 0.292          | 0.751          |
|                | concentration | 4.00                     | 1963.566       | <0.001***      |
|                | interaction   | 8.00                     | 0.622          | 0.756          |
| Sucrose        | genotype      | 2.00                     | 0.104          | 0.902          |
|                | concentration | 4.00                     | 1368.71        | <0.001***      |
|                | interaction   | 8.00                     | 1.8            | 0.096          |
| MSG            | genotype      | 2.00                     | 1.34           | 0.292          |
|                | concentration | 4.00                     | 1500.18        | <0.001***      |
|                | interaction   | 8.00                     | 0.323          | 0.954          |

\*:P<0.05, \*\*:P<0.01, \*\*\*: P<0.001

**Supplementary Table 8. Results of one-way ANOVA on 10  $\mu$ M capsaicin behavioral lick responses.**

|       | Degree of Freedom1 | Degree of Freedom2 | F Value | p Value |
|-------|--------------------|--------------------|---------|---------|
| Value | 2.00               | 8.63               | 182     | <.001** |

Tukey Post-Hoc Test – Value

|                       |                 | WT | <i>Ccn3</i> -KO | <i>Ccn3/Trpv1</i> -KO |
|-----------------------|-----------------|----|-----------------|-----------------------|
| WT                    | Mean difference | —  | -0.181          | -30.2                 |
|                       | p-value         | —  | 0.989           | <.001**               |
| <i>Ccn3</i> -KO       | Mean difference | —  | —               | -30.1                 |
|                       | p-value         | —  | —               | <.001**               |
| <i>Ccn3/Trpv1</i> -KO | Mean difference | —  | —               | —                     |
|                       | p-value         | —  | —               | —                     |

\*:P<0.05, \*\*:P<0.01, \*\*\*: P<0.001

**Supplementary Table 9. The marker corresponding to the cell annotated manually for the first time.**

|                            |                                                                                       |
|----------------------------|---------------------------------------------------------------------------------------|
| Taste cell                 | <i>Shh/Snap25/Otop1/Pkd2l1/Gad1/Trpm5/Entpd2/Gad2/Gnat3/Plcb2/Tas1r1/Tas1r3/Krt18</i> |
| Epithelial cell            | <i>Krt14</i>                                                                          |
| Epithelial progenitor cell | <i>Krt14/Lgr5</i>                                                                     |
| Endothelial cell           | <i>Kdr/Cdh5/Nrp1</i>                                                                  |
| Fibroblasts cell           | <i>Dpt/Mfap4/Lum</i>                                                                  |

**Supplementary Table 10. The marker corresponding to the cell annotated manually for the second time.**

|                     |                                         |
|---------------------|-----------------------------------------|
| Type I taste cell   | <i>Entpd2</i>                           |
| Type II taste cell  | <i>Trpm5/ Gnat3/Plcb2/Tas1r1/Tas1r3</i> |
| Type III taste cell | <i>Snap25/Otop1/Pkd211/Gad1</i>         |
| Type IV taste cell  | <i>Shh</i>                              |
